# Supplementary material for: Influence of Sex on Urinary Organic Acids: A Cross-Sectional Study in Children
Source: PubMed Central journal article supplement (PMC7013514; doi:10.3390/ijms21020582), 2020-01-16
Supplement: ijms-21-00582-s001.pdf [file ijms-21-00582-s001.pdf]

**Table S1.** Metabolites detected in less than 20% of the male and female cohorts.

| Metabolites                  | Age Group 1<br>(1–6 Months) |                     | Age-Group 2<br>(7–12 Months) |                     | Age-Group 3<br>(13–24 Months) |                     | Age-Group 4<br>(25–36 Months) |                     | % M-F     |
|------------------------------|-----------------------------|---------------------|------------------------------|---------------------|-------------------------------|---------------------|-------------------------------|---------------------|-----------|
|                              | Males<br>(N = 37)           | Females<br>(N = 37) | Males<br>(N = 30)            | Females<br>(N = 28) | Males<br>(N = 43)             | Females<br>(N = 38) | Males<br>(N = 42)             | Females<br>(N = 36) |           |
| 2-hydroxy-sebacate           | 0 (5)                       | 0 (1)               | 0 (1)                        | 0 (4)               | 0 (3)                         | 0 (1)               | 0 (3)                         | 0 (0)               | 7.9-4.3   |
| 2-keto-3-methylvalerate      | 0 (2)                       | 0 (4)               | 0 (1)                        | 0 (6)               | 0 (4)                         | 0 (4)               | 0 (3)                         | 0 (2)               | 6.6-11.5  |
| 2-keto-isovalerate           | 0 (1)                       | 0 (1)               | 0 (0)                        | 0 (1)               | 0 (0)                         | 0 (0)               | 0 (0)                         | 0 (1)               | 0.66-2.1  |
| 2-methylbutyrylglycine       | 0 (0)                       | 0 (3)               | 0 (0)                        | 0 (0)               | 0 (1)                         | 0 (1)               | 0 (3)                         | 0 (9)               | 2.6-9.3   |
| 3-hydroxy-3methyl- glutarate | 0 (2)                       | 0 (0)               | 0 (0)                        | 0 (2)               | 0 (2)                         | 0 (1)               | 0 (0)                         | 0 (0)               | 2.6-3.6   |
| 3-hydroxy-dodecanoate        | 0 (0)                       | 0 (0)               | 0 (0)                        | 0 (2)               | 0 (0)                         | 0 (1)               | 0 (0)                         | 0 (2)               | 0-3.6     |
| 3-hydroxy-butyrate           | 0 (4)                       | 0 (7)               | 0 (7)                        | 0 (8)               | 0 (8)                         | 0 (5)               | 0 (6)                         | 0 (3)               | 16.4-16.5 |
| 3-hydroxy-valerate           | 0 (1)                       | 0 (1)               | 0 (0)                        | 0 (0)               | 0 (0)                         | 0 (0)               | 0 (0)                         | 0 (0)               | 0.7-0.4   |
| 3-methylcrotonylglycine      | 0 (0)                       | 0 (3)               | 0 (0)                        | 0 (0)               | 0 (0)                         | 0 (0)               | 0 (1)                         | 0 (0)               | 0.7-2.1   |
| 4-hydroxy-butyrate           | 0 (0)                       | 0 (0)               | 0 (1)                        | 0 (0)               | 0 (0)                         | 0 (0)               | 0 (0)                         | 0 (0)               | 0.7-0     |
| 4-hydroxy-phenylpyruvate     | 0 (8)                       | 0 (4)               | 0 (2)                        | 0 (5)               | 0 (6)                         | 0 (7)               | 0 (4)                         | 0 (9)               | 13.1-17.9 |
| 5-hydroxy-indoleacetate      | 0 (1)                       | 0 (2)               | 0 (0)                        | 0 (0)               | 0 (0)                         | 0 (0)               | 0 (0)                         | 0 (0)               | 0.7-1.4   |
| 7-hydroxy-octanoate          | 0 (1)                       | 0 (1)               | 0 (0)                        | 0 (1)               | 0 (0)                         | 0 (1)               | 0 (1)                         | 0 (2)               | 1.3-3.6   |
| Homogentisate                | 0 (1)                       | 0 (0)               | 0 (0)                        | 0 (0)               | 0 (0)                         | 0 (0)               | 0 (0)                         | 0 (0)               | 0.7-0     |
| Homovanillate                | 0 (9)                       | 0 (3)               | 0 (3)                        | 0 (3)               | 0 (2)                         | 0 (4)               | 0 (5)                         | 0 (3)               | 12.5-9.3  |
| Isovalerylglycine            | 0 (0)                       | 0 (1)               | 0 (1)                        | 0 (2)               | 0 (0)                         | 0 (3)               | 0 (1)                         | 0 (11)              | 1.3-12.3  |
| Isobutyrylglycine            | 0 (2)                       | 0 (4)               | 0 (2)                        | 0 (2)               | 0 (9)                         | 0 (3)               | 0 (5)                         | 0 (8)               | 11.8-12.2 |
| Malonate                     | 0 (3)                       | 0 (7)               | 0 (2)                        | 0 (2)               | 0 (0)                         | 0 (2)               | 0 (2)                         | 0 (2)               | 4.6-9.3   |
| Methylcitrate                | 0 (0)                       | 0 (0)               | 0 (0)                        | 0 (0)               | 0 (0)                         | 0 (1)               | 0 (0)                         | 0 (1)               | 0-1.4     |
| N-acetyl-tyrosine            | 0 (6)                       | 0 (1)               | 0 (2)                        | 0 (2)               | 0 (1)                         | 0 (2)               | 0 (2)                         | 0 (1)               | 7.2-4.3   |
| Phenylacetate                | 0 (0)                       | 0 (0)               | 0 (0)                        | 0 (0)               | 0 (0)                         | 0 (1)               | 0 (0)                         | 0 (1)               | 0-1.4     |
| Phenylpyruvate               | 0 (0)                       | 0 (0)               | 0 (0)                        | 0 (0)               | 0 (0)                         | 0 (1)               | 0 (0)                         | 0 (0)               | 0.7-0.7   |
| Vanilmandelate               | 0 (7)                       | 0 (8)               | 0 (6)                        | 0 (6)               | 0 (4)                         | 0 (5)               | 0 (2)                         | 0 (2)               | 12.5-15.1 |
| 3,4-dihydroxy-butyrate       | 0 (0)                       | 0 (0)               | 0 (1)                        | 1 (14)              | 0 (0)                         | 0 (18)              | 0 (0)                         | 0 (15)              | 0.7-33.8  |
| 5-hydroxy-caproate           | 0 (6)                       | 0 (11)              | 0 (7)                        | 0 (13)              | 0 (11)                        | 0 (5)               | 0 (3)                         | 0 (8)               | 17.7-26.6 |

Values (mmol/mol creatinine) are expressed as median value; in round brackets the number of subject in which the metabolite was detected; %M-F represents the percentage calculated on the total of male and female populations, respectively.

**Table S2.** Intra-sex analysis of male cohorts of different class of age. Values (median values and IQR) are expressed as mmol/mol creatinine.

| Metabolites                  | Age-Group 1<br>(1–6 Months) (N = 37) | Age-Group 2<br>(7–12 Months) (N = 30) | Age-Group 3<br>(13–24 Months) (N = 43) | Age-Group 4<br>(25–36 Months) (N = 42) | P Value<br>(Kruskall-Wallis<br>Test) | Multiple<br>Comparisons<br>(Dunn's Test) |
|------------------------------|--------------------------------------|---------------------------------------|----------------------------------------|----------------------------------------|--------------------------------------|------------------------------------------|
| 2-ethyl-3-hydroxy-propionate | 0.0 (0-0.4)                          | 0.0 (0-0.9)                           | 0.0 (0-3.5)                            | 0.0 (0-2.8)                            | 0.022                                | None                                     |
| 2-hydroxy- glutarate         | 2.6 (1.0-4.0)                        | 2.1 (1.0-3.7)                         | 2 (1.7-2.9)                            | 1.2 (1.0-2.0)                          | NS                                   |                                          |
| 2-hydroxy-isobutyrate        | 0.0 (0-3.0)                          | 0.0 (0.0-6.0)                         | 2.8 (0-7.8)                            | 0.0 (0-6.8)                            | NS                                   |                                          |
| 2-keto-isocaproate           | 0.0 (0-0.2)                          | 0.0 (0.0-0.0)                         | 0.0 (0-0.6)                            | 0.0 (0-0.6)                            | NS                                   |                                          |
| 2methyl-3-hydroxy-butyrate   | 0.0 (0-0.8)                          | 0.0 (0-1.2)                           | 1.0 (0.0-3.0)                          | 0.0 (0-2.3)                            | NS                                   |                                          |
| 3-hydroxy-adipate            | 0.0 (0-1.0)                          | 0.0 (0.0-2.0)                         | 0.0 (0-25.0)                           | 0.0 (0-1.0)                            | NS                                   |                                          |
| 3-hydroxy-isobutyrate        | 14.0 (8.1-18.0)                      | 13.0 (10.0-17.0)                      | 14.0 (10.7-18.1)                       | 13.7 (11.0-18.1)                       | NS                                   |                                          |
| 3-hydroxy-isovalerate        | 0.0 (0.0-0.0)                        | 0.0 (0.0-1.3)                         | 0.0 (0.0-2.2)                          | 0.0 (0.0-2.7)                          | NS                                   |                                          |
| 3-hydroxy-propionate         | 3.3 (2.0-4.0)                        | 3.0 (2.1-4.0)                         | 3.0 (2.0-4.0)                          | 3 (1.8-4.9)                            | NS                                   |                                          |
| 3-hydroxy-sebacate           | 0.0 (0.0-0.0)                        | 0.0 (0.0-0.6)                         | 0.0 (0-0.6)                            | 0.0 (0.0-0.0)                          | NS                                   |                                          |
| 3-methyl- glutaconate        | 0.0 (0.0-4.0)                        | 2 (0.0-6.0)                           | 0.0 (0.0-3.0)                          | 2.0 (0.0-4.0)                          | NS                                   |                                          |
| 3-methyl- glutarate          | 0.0 (0.0-1.0)                        | 1.0 (0.0-1.5)                         | 0.0 (0.0-2.0)                          | 0.0 (0.0-1.0)                          | NS                                   |                                          |
| 4-hydroxy-phenylacetate      | 25 (14.01-41.6)                      | 22.6 (16.0-34.0)                      | 22.4 (15.8-32.0)                       | 21.8 (15.0-32.9)                       | NS                                   |                                          |
| 4-hydroxy-phenyllactate      | 1.0 (0.0-2.0)                        | 0.4 (0.0-1.0)                         | 0.5 (0.0-1.5)                          | 0.1 (0.0-1.0)                          | NS                                   |                                          |
| Adipate                      | 11.0 (6.9-15.8)                      | 8.9 (6.5-13.0)                        | 9.8 (7.0-13.8)                         | 7.6 (5.0-10.0)                         | NS                                   |                                          |
| Alpha-ketoglutarate          | 17.5 (4.30-36.3)                     | 10.2 (0-25.3)                         | 14.75 (0-35.7)                         | 7.25 (0-19.5)                          | NS                                   |                                          |
| Azelate                      | 0.0 (0-3.8)                          | 1.6 (0-4.4)                           | 2.2 (0-3.9)                            | 1.0 (0-3.2)                            | NS                                   |                                          |
| Cis-Aconitate                | 18.0 (7.0-30.6)                      | 16.0 (8.0-26.0)                       | 18.9 (7.0-34.9)                        | 14.9 (7.0-21.5)                        | NS                                   |                                          |
| Citrate                      | 0.0 (0.0-22.7)                       | 3.0 (0.0-21.0)                        | (0.0-5.7)                              | 0.0 (0.0-7.2)                          | NS                                   |                                          |
| Ethylmalonate                | 4.0 (2.0-7.1)                        | 4.8 (2.0-7.0)                         | 3.0 (2.0-4.1)                          | 3.0 (2.0-6.0)                          | NS                                   |                                          |
| Fumarate                     | 3 (0.15-5.69)                        | 1.52 (0.0-2.0)                        | 1.70 (0.12-2.5)                        | 0.6 (0.0-2.0)                          | <0.001                               | 1 vs 4                                   |
| Glutarate                    | 3.5 (1.7-4.9)                        | 3 (2.0-5.0)                           | 3.6 (2.9-5.9)                          | 2.8 (1.9-4.0)                          | NS                                   |                                          |
| Glycerate                    | 0.0 (0.0-0.0)                        | 0.0 (0.0-0.9)                         | 0.0 (0.0-26.0)                         | 0.0 (0.0-0.0)                          | NS                                   |                                          |

|                        |                  |                  |                   |                   |        |                                      |
|------------------------|------------------|------------------|-------------------|-------------------|--------|--------------------------------------|
| <i>Glycolate</i>       | 18.0 (10.0-24.7) | 20.3 (13.0-27.4) | 21.6 (12.3-30.5)  | 20.1 (12.8-33.8)  | NS     |                                      |
| <i>Hippurate</i>       | 24.3 (12.5-56.2) | 33.8 (19.0-63.0) | 79.9 (45.1-173.8) | 87.7 (51.0-163.0) | <0.001 | 1 vs 4<br>2 vs 4<br>1 vs 3<br>2 vs 3 |
| <i>Lactate</i>         | 28.0 (19.2-35.5) | 25.0 (16.4-32.9) | 19.6 (17.8-27.2)  | 21.2 (18.7-24.8)  | NS     |                                      |
| <i>Malate</i>          | 0.0 (0.0-0.7)    | 0.0 (0.0-1.1)    | 0.0 (0.0-1.2)     | 0.0 (0.0-0.0)     | NS     |                                      |
| <i>Methylmalonate</i>  | 1.0 (0-4.3)      | 0.9 (0-3.1)      | 0.0 (0.0-2.3)     | 0.0 (0.0-1.6)     | NS     |                                      |
| <i>Methylsuccinate</i> | 0.0 (0.0-1.9)    | 0.0 (0.0-3.0)    | 2.7 (0-4.2)       | 0.0 (0-2.9)       | NS     |                                      |
| <i>Oxalate</i>         | 0.0 (0.0-3.5)    | 0.5 (0-2.8)      | 0.0 (0.0-0.0)     | 0.0 (0.0-0.0)     | 0.002  | None                                 |
| <i>Palmitate</i>       | 6.0 (4.0-9.3)    | 5.1 (3.0-8.7)    | 5.0 (4.0-8.6)     | 5.0 (3.0-7.5)     | NS     |                                      |
| <i>Pimelate</i>        | 0.0 (0.0-2.0)    | 0.0 (0.0-1.3)    | 0.0 (0.0-2.0)     | 0.0 (0.0-1.5)     | NS     |                                      |
| <i>Pyroglutamate</i>   | 14.4 (6.0-22.2)  | 14.51 (8.6-22.0) | 13.9 (9.0-18.9)   | 11.4 (5.0-15.0)   | NS     |                                      |
| <i>Pyruvate</i>        | 25.0 (16.9-30.6) | 19.0 (14.0-28.0) | 25.1 (18.0-31.1)  | 22.5 (15.6-27.6)  | NS     |                                      |
| <i>Sebacate</i>        | 0.0 (0.0-1.0)    | 0 (0.0-0.8)      | 0.0 (0.0-0.0)     | 0.0 (0.0-0.0)     | NS     |                                      |
| <i>Stearate</i>        | 0.0 (0.0-6.5)    | 0.0 (0.0-4.1)    | 0.0 (0.0-8.1)     | 0.0 (0.0-5.6)     | NS     |                                      |
| <i>Suberate</i>        | 6.0 (2.9-11.5)   | 3.0 (1.8-5.0)    | 2.0 (1.1-4.9)     | 2.0 (0.9-3.1)     | <0.001 | 1 vs 3<br>1 vs 4                     |
| <i>Succinate</i>       | 58.4 (15.7-69.5) | 34.0 (22.0-42.0) | 29.0 (19.8-38.0)  | 19.0 (14.0-27.0)  | <0.001 | 1 vs 4<br>2 vs 4                     |
| <i>Tiglylglycine</i>   | 0.0 (0.0-0.0)    | 0.0 (0.0-0.0)    | 0.0 (0.0-0.8)     | 0.0 (0.0-0.4)     | 0.017  | None                                 |
| <i>Uracil</i>          | 0.0 (0.0-0.0)    | 0.0 (0.0-0.8)    | 0.0 (0.0-2.3)     | 0.0 (0.0-0.5)     | 0.033  | None                                 |

**Table S3.** Intra-sex analysis of female cohorts of different classes of age. Values (median values and IQR) are expressed as mmol/mol creatinine.

| Metabolites                         | Age-Group 1<br>(1–6 Months) (N = 37) | Age-Group 2<br>(7–12 Months) (N = 28) | Age-Group 3<br>(13–24 Months) (N = 38) | Age-Group 4<br>(25–36 Months) (N = 36) | P Value<br>(Kruskall-Wallis Test) | Multiple Comparisons<br>(Dunn's Test) |
|-------------------------------------|--------------------------------------|---------------------------------------|----------------------------------------|----------------------------------------|-----------------------------------|---------------------------------------|
| <i>2-ethyl-3-hydroxy-propionate</i> | 1.0 (0.0-2.2)                        | 1.01 (0.0-4.4)                        | 0.0 (0.0-0.0)                          | 0.0 (0.0-4.5)                          | 0.006                             | 2 vs 3<br>1 vs 2                      |
| <i>2-hydroxy-glutarate</i>          | 1.0 (0.1-2)                          | 2.5 (1.2-5.1)                         | 2.8 (0.0-4.9)                          | 2.0 (1.0-3.4)                          | 0.004                             | 1 vs 3                                |
| <i>2-hydroxy-isobutyrate</i>        | 4.0 (0.0-6.1)                        | 5.5 (0.0-9.3)                         | 0.0 (0.0-9.6)                          | 0.0 (0-9.0)                            | ns                                |                                       |
| <i>2-keto-isocaproate</i>           | 0.0 (0.0-0.1)                        | 0.0 (0.0-0.7)                         | 0.0 (0.0-0.0)                          | 0.0 (0.0-0.6)                          | ns                                |                                       |
| <i>2methyl-3-hydroxy-butyrate</i>   | 1.0 (0-1.8)                          | 1.9 (0.0-4.1)                         | 0.0 (0.0-3.0)                          | 0.0 (0.0-3.9)                          | ns                                |                                       |
| <i>3-hydroxy-adipate</i>            | 0.0 (0-0.9)                          | 0.0 (0.0-4.8)                         | 0.0 (0.0-1.1)                          | 0.0 (0.0-0.7)                          | ns                                |                                       |
| <i>3-hydroxy-isobutyrate</i>        | 9.0 (6.9-13.4)                       | 13.7 (10.0-15.9)                      | 14.6 (7.1-20.5)                        | 16.0 (12.0-22.5)                       | <0.001                            | 2 vs 4                                |
| <i>3-hydroxy-isovalerate</i>        | 0.0 (0.0-1.3)                        | 0.0 (0.0-3.2)                         | 0.0 (0.0-0.0)                          | 2.0 (0.0-4.0)                          | 0.04                              | none                                  |
| <i>3-hydroxy-propionate</i>         | 2.0 (1.5-4.0)                        | 2.9 (2.0-4.0)                         | 3.8 (2.4-6.3)                          | 4.2 (3.0-5.0)                          | 0.003                             | 2 vs 4                                |
| <i>3-hydroxy-sebacate</i>           | 0.0 (0.0-0.0)                        | 0.0 (0.0-0.4)                         | 0.0 (0.0-0.0)                          | 0.0 (0.0-0.0)                          | 0.024                             | none                                  |
| <i>3-methyl-glutaconate</i>         | 0.0 (0.0-0.2)                        | 3.5 (1.8-7.6)                         | 6.2 (2.0-9.0)                          | 3.5 (1.9-7.0)                          | <0.001                            | 1 vs 2<br>1 vs 3<br>1 vs 4            |
| <i>3-methyl-glutarate</i>           | 0.8 (0-1.3)                          | 0.2 (0.0-1.1)                         | 0.0 (0.0-1.7)                          | 0.0 (0.0-0.9)                          | ns                                |                                       |
| <i>4-hydroxy-phenylacetate</i>      | 16.0 (11.0-24.1)                     | 34.2 (15.5-59.1)                      | 26.0 (10.4-35.8)                       | 26.5 (13.4-47.4)                       | 0.014                             | 1 vs 2                                |
| <i>4-hydroxy-phenyllactate</i>      | 0.5 (0.0-1.0)                        | 1.1 (0.0-2.3)                         | 1.0 (0.0-2.0)                          | 0.7 (0.0-1.7)                          | ns                                |                                       |
| <i>Adipate</i>                      | 7.1 (5.0-11.6)                       | 10.3 (5.3-16.1)                       | 8.2 (4.9-11.0)                         | 8.7 (6.0-10.7)                         | ns                                |                                       |
| <i>Alpha-ketoglutarate</i>          | 18.0 (7.5-28.9)                      | 30.0 (14.8-64.7)                      | 27.0 (12.0-58.0)                       | 17.7 (5.7-39.5)                        | 0.015                             | 1 vs 2<br>2 vs 3                      |
| <i>Azelaate</i>                     | 1.2 (0-2.1)                          | 3.6 (1.0-6.3)                         | 0.0 (0.0-4.0)                          | 0.0 (0.0-1.95)                         | <0.001                            | 2 vs 3<br>2 vs 4                      |
| <i>Cis-Aconitate</i>                | 8.3 (2.0-23.6)                       | 24.2 (8.0-40.7)                       | 16.6 (8.0-28.8)                        | 14.0 (3.0-28.3)                        | 0.026                             | 1 vs 2                                |
| <i>Citrate</i>                      | 0.0 (0.0-4.1)                        | 3.9 (0.0-33.7)                        | 4.5 (0.0-20.0)                         | 0.0 (0.0-0.9)                          | 0.001                             | 2 vs 4<br>3 vs 4                      |
| <i>Ethylmalonate</i>                | 2.4 (1.6-3.8)                        | 4.33 (2.5-6.3)                        | 4.00 (2.5-7.0)                         | 3.0 (2.0-5.0)                          | 0.006                             | 1 vs 2<br>1 vs 3                      |
| <i>Fumarate</i>                     | 1.0 (0.0-1.5)                        | 2.4 (1.2-4.3)                         | 1.2 (0.0-2.6)                          | 1.6 (0.0-2.9)                          | 0.003                             | 1 vs 2<br>1 vs 2                      |
| <i>Glutarate</i>                    | 2.0 (1.0-3.0)                        | 3.5 (2.0-5.7)                         | 3.0 (1.9-5.0)                          | 3.4 (1.5-4.8)                          | 0.002                             | 1 vs 3<br>1 vs 4                      |
| <i>Glycerate</i>                    | 0.0 (0.0-0.0)                        | 0.0 (0.0-2.0)                         | 0.0 (0-1.1)                            | 0.0 (0.0-0.0)                          | ns                                |                                       |
| <i>Glycolate</i>                    | 21.2 (10.5-29.0)                     | 20.2 (14.2-33.9)                      | 26.9 (18.0-46.1)                       | 26.0 (15.5-34.7)                       | ns                                |                                       |
| <i>Hippurate</i>                    | 75.0 (31.7-157.4)                    | 57.3 (13.5-131.5)                     | 40.6 (14.0-103.0)                      | 62.6 (31.5-121.5)                      | ns                                |                                       |
| <i>Lactate</i>                      | 18.84<br>(13.79-22.30)               | 28.02<br>(22.80-35.82)                | 24.84<br>(16.21-38.44)                 | 20.4 (14.0-26.0)                       | <0.001                            | 1 vs 2<br>2 vs 4                      |

|                 |                  |                  |                  |                  |        |                  |
|-----------------|------------------|------------------|------------------|------------------|--------|------------------|
| Malate          | 0.0 (0-0.1)      | 0.0 (0-1.8)      | 0.0 (0.0-0.0)    | 0.0 (0-0.6)      | ns     |                  |
| Methylmalonate  | 0.8 (0.0-1.7)    | 0.0 (0.0-1.9)    | 0.0 (0.0-0.0)    | 0.0 (0-1.3)      | ns     |                  |
| Methylsuccinate | 2.4 (0-3.1)      | 4.4 (0.0-5.3)    | 2.3 (0.0-5.7)    | 0.0 (0.0-4.6)    | ns     |                  |
| Oxalate         | 0.0 (0.0-0.8)    | 0.0 (0.0-6.4)    | 0.0 (0.0-6.8)    | 0.0 (0.0-0.5)    | ns     |                  |
| Palmitate       | 5.0 (3.5-7.2)    | 7.3 (4.0-10.5)   | 6.6 (3.0-10.8)   | 8.1 (3.0-18.2)   | ns     |                  |
| Pimelate        | 1 (0-1.8)        | 2.2 (0-3.6)      | 0.0 (0.0-1.9)    | 0.0 (0.0-1.6)    | 0.007  | 2 vs 4           |
| Pyroglutamate   | 9.0 (5.0-12.3)   | 20.1 (6.7-27.1)  | 13.8 (10.0-21.4) | 14.0 (6.6-17.1)  | 0.007  | 1 vs 2<br>1 vs 3 |
| Pyruvate        | 18.0 (14.0-23.6) | 29.1 (17.3-35.1) | 30.3 (12.1-40.0) | 24.9 (19.0-30.7) | 0.025  | 1 vs 2           |
| Sebacate        | 0.0 (0.0-0.0)    | 0.0 (0-1.8)      | 0.0 (0.0-0.0)    | 0.0 (0.0-0.0)    | <0.001 | 1 vs 2<br>2 vs 3 |
| Stearate        | 4.44 (0-6.61)    | 6.31 (0-9.75)    | 0.0 (0.0-9.0)    | 0.0 (0.0-12.1)   | ns     |                  |
| Suberate        | 1.7 (0.6-3.0)    | 3.1 (0.6-6.2)    | 2.0 (1.0-3.0)    | 2.3 (1.0-3.0)    | ns     |                  |
| Succinate       | 17.0 (11.9-24.1) | 28.5 (20.2-49.6) | 23.3 (15.0-33.0) | 20.2 (14.0-34.4) | ns     |                  |
| Tiglylglycine   | 0.0 (0.0-0.1)    | 0.0 (0.0-0.0)    | 0.0 (0.0-0.0)    | 0.0 (0.0-0.9)    | ns     |                  |
| Uracil          | 0.0 (0.0-0.9)    | 0.0 (0.0-2.8)    | 0.0 (0-3.3)      | 0.0 (0.0-2.4)    | ns     |                  |

**Table S4.** Metabolic pathway analysis which includes the tested urinary metabolites in male individuals.

| Pathway Name                                | Match Status | p      | -log(p) | Holm p    | FDR       | Impact  | Metabolites                    |
|---------------------------------------------|--------------|--------|---------|-----------|-----------|---------|--------------------------------|
| Phenylalanine metabolism                    | 3(45)        | 0.0001 | 9.0     | 0.0094014 | 0.0094014 | 0.0315  | Hippurate; Succinate; Fumarate |
| Citrate cycle (TCA cycle)                   | 2(20)        | 0.0010 | 6.9     | 0.076216  | 0.037206  | 0.0313  | Succinate; Fumarate            |
| Alanine, aspartate and glutamate metabolism | 2(24)        | 0.0014 | 6.5     | 0.10883   | 0.037206  | 0.00285 | Succinate; Fumarate            |
| Butanoate metabolism                        | 2(40)        | 0.0039 | 5.5     | 0.29824   | 0.077465  | 0.03545 | Succinate; Fumarate            |
| Glyoxylate and dicarboxylate metabolism     | 2(50)        | 0.0060 | 5.1     | 0.45717   | 0.096246  | 0.12894 | Succinate; Oxalate             |

**Table S5.** Metabolic pathway analysis which includes the tested urinary metabolites in female individuals.

| Pathway Name                                | Match Status | p      | -log(p) | Holm p    | FDR       | Impact  | Metabolites                                                     |
|---------------------------------------------|--------------|--------|---------|-----------|-----------|---------|-----------------------------------------------------------------|
| Citrate cycle (TCA cycle)                   | 5(20)        | 0.0000 | 17.4    | 0.022834  | 0.022834  | 0.31123 | Alpha-ketoglutarate; Cis-aconitate; Citrate; Pyruvate; Fumarate |
| Glyoxylate and dicarboxylate metabolism     | 4(50)        | 0.0001 | 9.2     | 0.0081165 | 0.0041096 | 0.00643 | Cis-aconitate; Alpha-ketoglutarate; Citrate; Pyruvate           |
| Alanine, aspartate and glutamate metabolism | 3(24)        | 0.0002 | 8.4     | 0.018214  | 0.006227  | 0.00285 | Pyruvate; Alpha-ketoglutarate; Fumarate                         |
| Butanoate metabolism                        | 3(40)        | 0.0011 | 6.8     | 0.083475  | 0.021682  | 0.10287 | Pyruvate; Alpha-ketoglutarate; Fumarate                         |

**Table S6.** Age group I: significant metabolic pathways.

| Pathway Name                                | Match Status | p      | -log(p) | Holm p  | FDR     | Impact  | Metabolites                    |
|---------------------------------------------|--------------|--------|---------|---------|---------|---------|--------------------------------|
| Phenylalanine metabolism                    | 3(45)        | 0.0019 | 6.2     | 0.15403 | 0.15403 | 0.0315  | Hippurate; Succinate; Fumarate |
| Citrate cycle (TCA cycle)                   | 2(20)        | 0.0056 | 5.2     | 0.44428 | 0.17139 | 0.0313  | Succinate; Fumarate            |
| Alanine, aspartate and glutamate metabolism | 2(24)        | 0.0081 | 4.8     | 0.62879 | 0.17139 | 0.00285 | Succinate; Fumarate            |

|                       |       |        |     |         |         |         |                    |
|-----------------------|-------|--------|-----|---------|---------|---------|--------------------|
| Propanoate metabolism | 3(76) | 0.0086 | 4.8 | 0.65986 | 0.17139 | 0.05093 | Succinate; Lactate |
|-----------------------|-------|--------|-----|---------|---------|---------|--------------------|

**Table S7.** Age group II: significant metabolic pathways.

| Pathway Name                                | Match Status | p      | -log(p) | Holm p    | FDR       | Impact  | Metabolites                                   |
|---------------------------------------------|--------------|--------|---------|-----------|-----------|---------|-----------------------------------------------|
| Citrate cycle (TCA cycle)                   | 3(30)        | 0.0000 | 11.5    | 7.7332    | 6.8391    | 0.19285 | Pyruvate;<br>Alpha-ketoglutarate;<br>Fumarate |
| Alanine, Aspartate and glutamate metabolism | 3(24)        | 0.0000 | 11.0    | 0.0013507 | 6.8391    | 0.00285 | Pyruvate;<br>Alpha-ketoglutarate;<br>Fumarate |
| Butanoate metabolism                        | 3(40)        | 0.0001 | 9.4     | 0.0064125 | 0.0021923 | 0.10287 | Pyruvate;<br>Alpha-ketoglutarate;<br>Fumarate |
| Vitamin B6 metabolism                       | 2(32)        | 0.0025 | 6.0     | 0.19135   | 0.049702  | 0.03828 | Pyruvate;<br>Alpha-ketoglutarate              |

**Table S8.** Age group III: significant metabolic pathways.

| Pathway Name                            | Match Status | p      | -log(p) | Holm p   | FDR     | Impact  | Metabolites                                         |
|-----------------------------------------|--------------|--------|---------|----------|---------|---------|-----------------------------------------------------|
| Glyoxylate and dicarboxylate metabolism | 4(50)        | 0.0000 | 12.9    | 1.9207   | 1.9207  | 0.13906 | Alpha-ketoglutarate;<br>Glycolate; Oxalate; Citrate |
| Citrate cycle (TCA cycle)               | 2(20)        | 0.0010 | 6.9     | 0.076216 | 0.03859 | 0.14904 | Alpha-ketoglutarate; Citrate                        |
| D-glutamine and D-glutamate metabolism  | 1(11)        | 0.0271 | 3.6     | 1.0      | 0.72364 | 0.0     | Alpha-ketoglutarate                                 |

**Table S9.** Age group IV: significant metabolic pathways.

| Pathway Name                                | Match Status | p      | -log(p) | Holm p   | FDR      | Impact  | Metabolites                      |
|---------------------------------------------|--------------|--------|---------|----------|----------|---------|----------------------------------|
| Citrate cycle (TCA cycle)                   | 2(20)        | 0.0004 | 7.8     | 0.031182 | 0.014345 | 0.17601 | Alpha-ketoglutarate;<br>Pyruvate |
| Alanine, aspartate and glutamate metabolism | 2(24)        | 0.0006 | 7.5     | 0.044631 | 0.014345 | 0.0     | Alpha-ketoglutarate;<br>Pyruvate |
| Vitamin B6 metabolism                       | 2(32)        | 0.0010 | 6.9     | 0.076816 | 0.016172 | 0.03828 | Alpha-ketoglutarate;<br>Pyruvate |
| Butanoate metabolism                        | 2(40)        | 0.0016 | 6.4     | 0.11868  | 0.021098 | 0.08516 | Alpha-ketoglutarate;<br>Pyruvate |
